# Supplementary material
Source: PubMed Central journal article supplement (PMC6624817)
Supplement: jamasurg-154-e192279-s001.pdf [file jamasurg-154-e192279-s001.pdf]

## Supplementary Online Content

Newgard CD, Caughey A, McConnell KJ, et al. Comparison of injured older adults included in vs excluded from trauma registries with 1-year follow-up. *JAMA Surg*. Published online July 10, 2019. doi:10.1001/jamasurg.2019.2279

**eFigure.** Cohort development schematic

**eTable 1.** Comparison of patients included vs excluded from the primary analytic cohort

**eTable 2.** Specific injury diagnoses among 2241 older adults with extremity Abbreviated Injury Scale (AIS) scores  $\geq 3$  by trauma registry status and whether the injury was isolated

**eTable 3.** Absolute numbers of high-risk patients not captured by trauma registries by final hospital destination

This supplementary material has been provided by the authors to give readers additional information about their work.

**eFigure 1.** Cohort development schematic

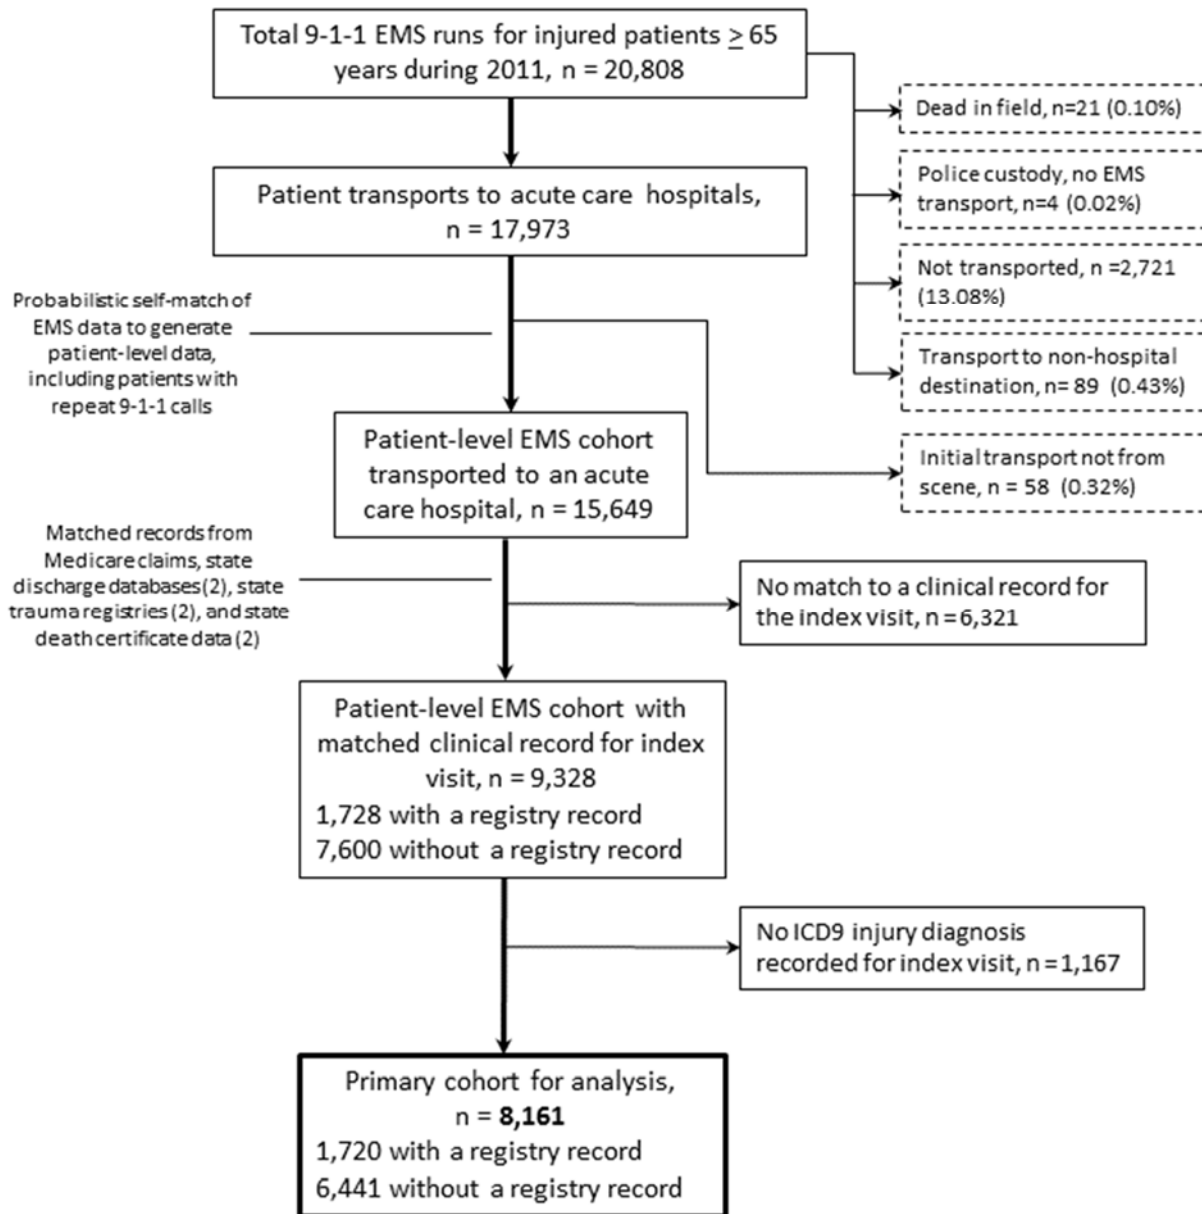

**eTable 1.** Comparison of patients included vs excluded from the primary analytic cohort

|                                         | Primary study sample (n = 8,161) |         |                          |         | Excluded   |         |
|-----------------------------------------|----------------------------------|---------|--------------------------|---------|------------|---------|
|                                         | Captured in a trauma registry    |         | Not in a trauma registry |         | -          |         |
|                                         | n = 1,720                        |         | n = 6,441                |         | n = 7,488† |         |
| <b>Demographics:</b>                    |                                  |         |                          |         |            |         |
| Mean – age (years)                      | 80.5                             |         | 82.6                     |         | 81.8       |         |
| Women                                   | 1,032                            | (60.0%) | 4,547                    | (70.6%) | 4,961      | (67.2%) |
| <b>Out-of-hospital characteristics:</b> |                                  |         |                          |         |            |         |
| Met field triage criteria, per EMS      | 1,240                            | (72.1%) | 158                      | (2.5%)  | 146        | (2.0%)  |
| SBP ≤ 100 mmHg                          | 99                               | (5.8%)  | 269                      | (4.2%)  | 256        | (3.7%)  |
| Respiratory rate ≤ 10 or ≥ 24           | 186                              | (10.8%) | 354                      | (5.5%)  | 357        | (5.4%)  |
| GCS ≤ 8                                 | 50                               | (2.9%)  | 8                        | (0.1%)  | 14         | (0.3%)  |
| Assisted ventilation                    | 40                               | (2.3%)  | 22                       | (0.3%)  | 28         | (0.4%)  |
| <b>Mechanism of Injury</b>              |                                  |         |                          |         |            |         |
| Fall                                    | 1,412                            | (82.1%) | 5,803                    | (90.1%) | 3,764      | (80.8%) |
| Motor vehicle crash                     | 195                              | (11.4%) | 183                      | (2.9%)  | 319        | (6.8%)  |
| Motor vehicle vs. pedestrian            | 38                               | (2.2%)  | 28                       | (0.4%)  | 26         | (0.6%)  |
| Penetrating injury                      | 10                               | (0.6%)  | 50                       | (0.8%)  | 36         | (0.8%)  |
| Other                                   | 65                               | (3.8%)  | 377                      | (5.9%)  | 3,343      | (11.0%) |
| <b>Initial hospital:</b>                |                                  |         |                          |         |            |         |
| Level I                                 | 501                              | (29.1%) | 408                      | (6.3%)  | 472        | (6.4%)  |
| Level II                                | 214                              | (12.4%) | 401                      | (6.2%)  | 492        | (6.6%)  |
| Level III                               | 608                              | (35.4%) | 904                      | (14.0%) | 1,257      | (17.0%) |
| Level IV/V                              | 263                              | (15.3%) | 970                      | (15.1%) | 1,057      | (14.3%) |
| Non-trauma hospital                     | 134                              | (7.8%)  | 3,758                    | (58.3%) | 4,140      | (55.9%) |
| <b>Mortality:</b>                       |                                  |         |                          |         |            |         |
| 30-day mortality                        | 152                              | (8.8%)  | 392                      | (6.1%)  | 251        | (3.4%)  |
| 90-day mortality                        | 229                              | (13.3%) | 725                      | (11.3%) | 509        | (6.8%)  |
| 365-day mortality                       | 356                              | (20.7%) | 1,531                    | (23.8%) | 1,288      | (17.2%) |

\*EMS = emergency medical services; SBP = systolic blood pressure; GCS = Glasgow Coma Scale score; ISS = Injury Severity Score; AIS = Abbreviated Injury Scale score.

†Based on observed values for each variable. Missingness about excluded patients ranged from 0% (mortality, age, assisted ventilation) to 37.8% (mechanism of injury).

**eTable 2.** Specific injury diagnoses among 2241 older adults with extremity Abbreviated Injury Scale (AIS) scores  $\geq 3$  by trauma registry status and whether the injury was isolated

|                                                  | <b>Isolated Extremity AIS <math>\geq 3</math></b><br>(all other body regions AIS $\leq 1$ )<br>(n = 1,982) |                                              | <b>All patients with extremity AIS <math>\geq 3</math></b><br>(n = 2,241) |                                              |
|--------------------------------------------------|------------------------------------------------------------------------------------------------------------|----------------------------------------------|---------------------------------------------------------------------------|----------------------------------------------|
|                                                  | <b>In Trauma Registry</b><br>(n = 339)                                                                     | <b>Not in Trauma Registry</b><br>(n = 1,643) | <b>In Trauma Registry</b><br>(n = 449)                                    | <b>Not in Trauma Registry</b><br>(n = 1,792) |
| Fracture of neck of femur (hip)                  | 240 (70.8%)                                                                                                | 1,491 (90.7%)                                | 304 (67.7%)                                                               | 1,628 (90.8%)                                |
| Fracture of pelvis                               | 11 (3.2%)                                                                                                  | 16 (1%)                                      | 33 (7.3%)                                                                 | 19 (1.1%)                                    |
| Fracture of humerus                              | 3 (0.9%)                                                                                                   | 5 (0.3%)                                     | 6 (1.3%)                                                                  | 7 (0.4%)                                     |
| Fracture of radius & ulna                        | 16 (4.7%)                                                                                                  | 13 (0.8%)                                    | 23 (5.1%)                                                                 | 14 (0.8%)                                    |
| Fracture of other & unspecified parts of femur   | 90 (26.5%)                                                                                                 | 192 (11.7%)                                  | 116 (25.8%)                                                               | 219 (12.2%)                                  |
| Fracture of tibia & fibula                       | 7 (2.1%)                                                                                                   | 2 (0.1%)                                     | 11 (2.4%)                                                                 | 2 (0.1%)                                     |
| Fracture of ankle                                | 12 (3.5%)                                                                                                  | 12 (0.7%)                                    | 14 (3.1%)                                                                 | 12 (0.7%)                                    |
| Dislocations                                     | 3 (0.9%)                                                                                                   | 2 (0.1%)                                     | 6 (1.3%)                                                                  | 2 (0.1%)                                     |
| Traumatic amputation of leg or foot              | 2 (0.3%)                                                                                                   | 0                                            | 2 (0.2%)                                                                  | 0                                            |
| Injury to blood vessels of upper extremity       | 0                                                                                                          | 0                                            | 1 (0.2%)                                                                  | 0                                            |
| Injury to blood vessels of lower extremity       | 2 (0.6%)                                                                                                   | 1 (0.1%)                                     | 5 (1.1%)                                                                  | 1 (0.1%)                                     |
| Crushing injury of upper limb                    | 0                                                                                                          | 1 (0.1%)                                     | 0                                                                         | 1 (0.1%)                                     |
| Crushing injury of lower limb                    | 3 (0.9%)                                                                                                   | 1 (0.1%)                                     | 3 (0.7%)                                                                  | 1 (0.1%)                                     |
| Crushing injury of multiple or unspecified sites | 0                                                                                                          | 1 (0.1%)                                     | 0                                                                         | 1 (0.1%)                                     |

\*Patients could have more than one type of extremity injury with AIS  $\geq 3$ , so row proportions may add to greater than 100%.

**eTable 3.** Absolute numbers of high-risk patients not captured by trauma registries by final hospital destination

| High-risk definition          | Non-trauma hospital | Level IV-V | Level III | Level II | Level I | Total |
|-------------------------------|---------------------|------------|-----------|----------|---------|-------|
| ISS $\geq$ 16                 | 113                 | 9          | 19        | 17       | 20      | 178   |
| Head AIS $\geq$ 3             | 101                 | 12         | 31        | 15       | 20      | 179   |
| Chest AIS $\geq$ 3            | 26                  | 7          | 4         | 6        | 3       | 46    |
| Abdominal-pelvic AIS $\geq$ 3 | 3                   | 0          | 3         | 1        | 0       | 7     |
| Major non-orthopedic surgery  | 47                  | 6          | 9         | 2        | 4       | 68    |
| Extremity AIS $\geq$ 3        | 1147                | 254        | 206       | 115      | 70      | 1792  |
| Orthopedic surgery            | 1158                | 245        | 214       | 114      | 78      | 1809  |
